# Supplementary material for: CBD-oil as a potential solution in case of severe tamoxifen-related side effects
Source: Springer Nature journal article supplement (doi:10.1038/s41523-023-00570-x), 2023-08-05
Supplement: MOESM1 [file 41523_2023_570_MOESM1_ESM.pdf]

## Supplementary information

**Supplementary table 1. Tamoxifen pharmacokinetics with or without CBD per CYP2D6 phenotype**

| Pharmacokinetic parameters                        | Tamoxifen monotherapy <sup>1</sup> | Tamoxifen + CBD <sup>1</sup> | Relative difference (%)<br>with vs without CBD (90% CI) |
|---------------------------------------------------|------------------------------------|------------------------------|---------------------------------------------------------|
| <b>Intermediate metabolizers (IM)</b>             |                                    |                              |                                                         |
| Tamoxifen AUC <sub>0-24h</sub> (N=8) <sup>2</sup> | 8130(59)                           | 7570 (64)                    | -6.9% (-13.2, -0.2%)                                    |
| Tamoxifen C <sub>min</sub> (N=13) <sup>3</sup>    | 321 (55)                           | 309 (58)                     | -3.7% (-10.1, +3.1%)                                    |
| Endoxifen AUC <sub>0-24h</sub> (N=8) <sup>2</sup> | 623 (28)                           | 494 (18)                     | -20.8% (-26.4, -14.8%)                                  |
| Endoxifen C <sub>min</sub> (N=13) <sup>3</sup>    | 26 (29)                            | 22 (28)                      | -17.7% (-23.3, -11.7%)                                  |
| <b>Extensive metabolizers (EM)</b>                |                                    |                              |                                                         |
| Tamoxifen AUC <sub>0-24h</sub> (N=7) <sup>2</sup> | 6090 (76)                          | 6210 (57)                    | +2.0% (-6.1, +10.8%)                                    |
| Tamoxifen C <sub>min</sub> (N=11) <sup>3</sup>    | 268 (59)                           | 245 (51)                     | -8.5% (-18.6, +3.0%)                                    |
| Endoxifen AUC <sub>0-24h</sub> (N=7) <sup>2</sup> | 618 (15)                           | 604 (13)                     | -2.2% (-11.1, +7.6%)                                    |
| Endoxifen C <sub>min</sub> (N=11) <sup>3</sup>    | 31 (46)                            | 27 (34)                      | -13.7% (-21.9, -4.6%)                                   |

<sup>1</sup>geometric mean (coefficient of variation %) <sup>2</sup>all patients with IM and EM metabolism where AUC was determined <sup>3</sup>patients with IM and EM metabolism where AUC was determined AND all other patients with IM and EM metabolism where only C<sub>min</sub> was determined

**Supplementary table 2. FACT-ES items Endocrine subscale**

| Endocrine subscale items FACT-ES           |            |              |           |             |           |
|--------------------------------------------|------------|--------------|-----------|-------------|-----------|
| ES items                                   | Not at all | A little bit | Some-what | Quite a bit | Very much |
| I have hot flashes                         | 0          | 1            | 2         | 3           | 4         |
| I have cold sweats                         | 0          | 1            | 2         | 3           | 4         |
| I have night sweats                        | 0          | 1            | 2         | 3           | 4         |
| I have vaginal discharge                   | 0          | 1            | 2         | 3           | 4         |
| I have vaginal itching/irritation          | 0          | 1            | 2         | 3           | 4         |
| I have vaginal bleeding or spotting        | 0          | 1            | 2         | 3           | 4         |
| I have vaginal dryness                     | 0          | 1            | 2         | 3           | 4         |
| I have pain or discomfort with intercourse | 0          | 1            | 2         | 3           | 4         |
| I have lost interest in sex                | 0          | 1            | 2         | 3           | 4         |
| I have gained weight                       | 0          | 1            | 2         | 3           | 4         |
| I feel lightheaded/dizzy                   | 0          | 1            | 2         | 3           | 4         |
| I have been vomiting                       | 0          | 1            | 2         | 3           | 4         |
| I have diarrhea                            | 0          | 1            | 2         | 3           | 4         |
| I get headaches                            | 0          | 1            | 2         | 3           | 4         |
| I feel bloated                             | 0          | 1            | 2         | 3           | 4         |
| I have breast sensitivity/tenderness       | 0          | 1            | 2         | 3           | 4         |
| I have mood swings                         | 0          | 1            | 2         | 3           | 4         |
| I am irritable                             | 0          | 1            | 2         | 3           | 4         |
| I have pain in my joints                   | 0          | 1            | 2         | 3           | 4         |

**Legend.** *The FACT-ES has a 5 point liker-type response scale and contains 46 questions in total. It measures four domains of health-related quality of life: physical, social, emotional and functional well-being in 27 items. Also, it is a measure of side effects of endocrine treatments given in breast cancer patients (ES, 19 items, see above). Some items were negatively framed and were therefore reversed for analysis. High scores of the FACT-ES equate with good quality of life and/or experiencing few side effects while lower scores indicate poorer quality of life and/or experiencing many/severe side effects.*
